# Supplementary material for: N-doped magnetic covalent organic frameworks for preconcentration of allergenic disperse dyes in textiles of fall protection equipment
Source: Royal Society of Chemistry journal article supplement (doi:10.1039/c9ay00900k), 2019-01-01
Supplement: c9ay00900k1.pdf [file c9ay00900k1.pdf]

### Supplementary information

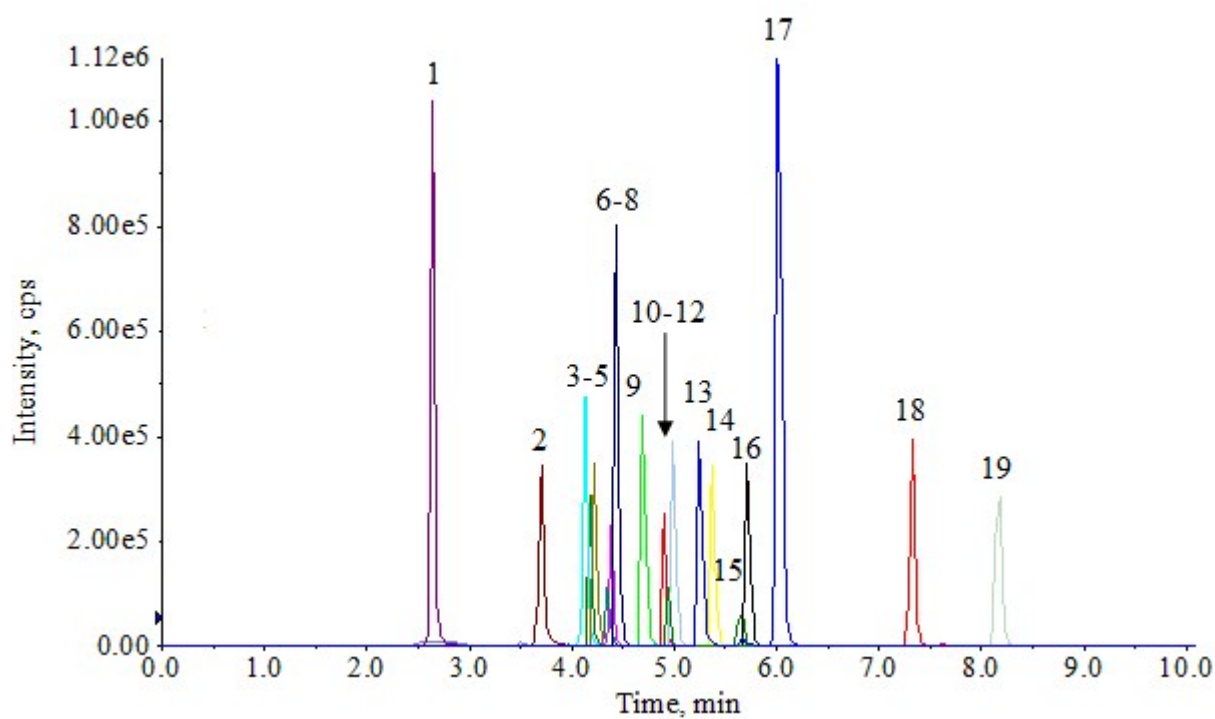

**Fig. S1** MRM chromatograms of 19 allergenic disperse dyes (the peak numbers are the same as in Table 1)

**Table S1** Matrix effect of allergenic disperse dyes in textiles without and with N-Mag-COFs

| Mag-dSPE procedure       |                                                |                                                                                   |                                                                                |                                                                           |
|--------------------------|------------------------------------------------|-----------------------------------------------------------------------------------|--------------------------------------------------------------------------------|---------------------------------------------------------------------------|
| Allergenic disperse dyes | Added/<br>( $\mu\text{g}\cdot\text{kg}^{-1}$ ) | Mean matrix effect <sup>a</sup> without<br>Mag-dSPE procedure (%,<br><i>n</i> =6) | Mean matrix effect <sup>a</sup> with<br>Mag-dSPE procedure (%,<br><i>n</i> =6) | Mean recovery <sup>b</sup> with<br>Mag-dSPE procedure<br>(%, <i>n</i> =6) |
| Basic red 9              | 0.3                                            | 49.2                                                                              | 91.9                                                                           | 105                                                                       |
| Disperse blue 7          | 0.3                                            | 58.6                                                                              | 93.2                                                                           | 90.7                                                                      |
| Disperse blue 1          | 0.3                                            | 65.3                                                                              | 80.6                                                                           | 82.3                                                                      |
| Disperse blue 3          | 0.3                                            | 52.9                                                                              | 92.7                                                                           | 91.2                                                                      |
| Disperse red 11          | 0.3                                            | 50.2                                                                              | 89.1                                                                           | 85.3                                                                      |
| Disperse blue 102        | 0.8                                            | 61.8                                                                              | 96.3                                                                           | 98.4                                                                      |
| Disperse yellow 9        | 0.8                                            | 50.2                                                                              | 72.4                                                                           | 72.7                                                                      |
| Disperse red 17          | 0.3                                            | 53.1                                                                              | 102                                                                            | 108                                                                       |
| Disperse blue 106        | 0.3                                            | 55.6                                                                              | 93.1                                                                           | 90.2                                                                      |
| Disperse orange 3        | 0.3                                            | 61.9                                                                              | 87.2                                                                           | 82.6                                                                      |
| Disperse brown 1         | 0.8                                            | 53.3                                                                              | 82.9                                                                           | 87.3                                                                      |
| Disperse yellow 3        | 0.3                                            | 54.7                                                                              | 91.1                                                                           | 96.2                                                                      |
| Disperse red 1           | 0.3                                            | 62.2                                                                              | 82.4                                                                           | 87.1                                                                      |
| Disperse orange 11       | 0.3                                            | 63.8                                                                              | 91.6                                                                           | 93.8                                                                      |
| Disperse yellow 39       | 3.0                                            | 52.1                                                                              | 85.3                                                                           | 95.0                                                                      |
| Disperse yellow 49       | 0.3                                            | 50.9                                                                              | 93.3                                                                           | 90.1                                                                      |
| Disperse blue 124        | 0.3                                            | 56.8                                                                              | 92.8                                                                           | 91.6                                                                      |
| Disperse orange 37       | 0.3                                            | 60.7                                                                              | 86.2                                                                           | 89.3                                                                      |
| Disperse orange 1        | 0.3                                            | 52.1                                                                              | 92.8                                                                           | 97.2                                                                      |

<sup>a</sup> Expressed as (the mean peak area of analyte spiked after extraction/the mean peak area of the neat analyte standard)  $\times 100\%$ .

<sup>b</sup> Analytes were determined using the corresponding calibration curves.
